# Supplementary material for: Quantitative phenotype analysis to identify, validate and compare rat disease models
Source: Oxford University Press journal article supplement (doi:10.1093/database/baz037), 2019-01-01
Supplement: supplemental_information_baz037.pdf [file supplemental_information_baz037.pdf]

# SUPPLEMENTARY INFORMATION I: META-ANALYSIS SUMMARIES FOR 24 CARDIOVASCULAR PHENOTYPES

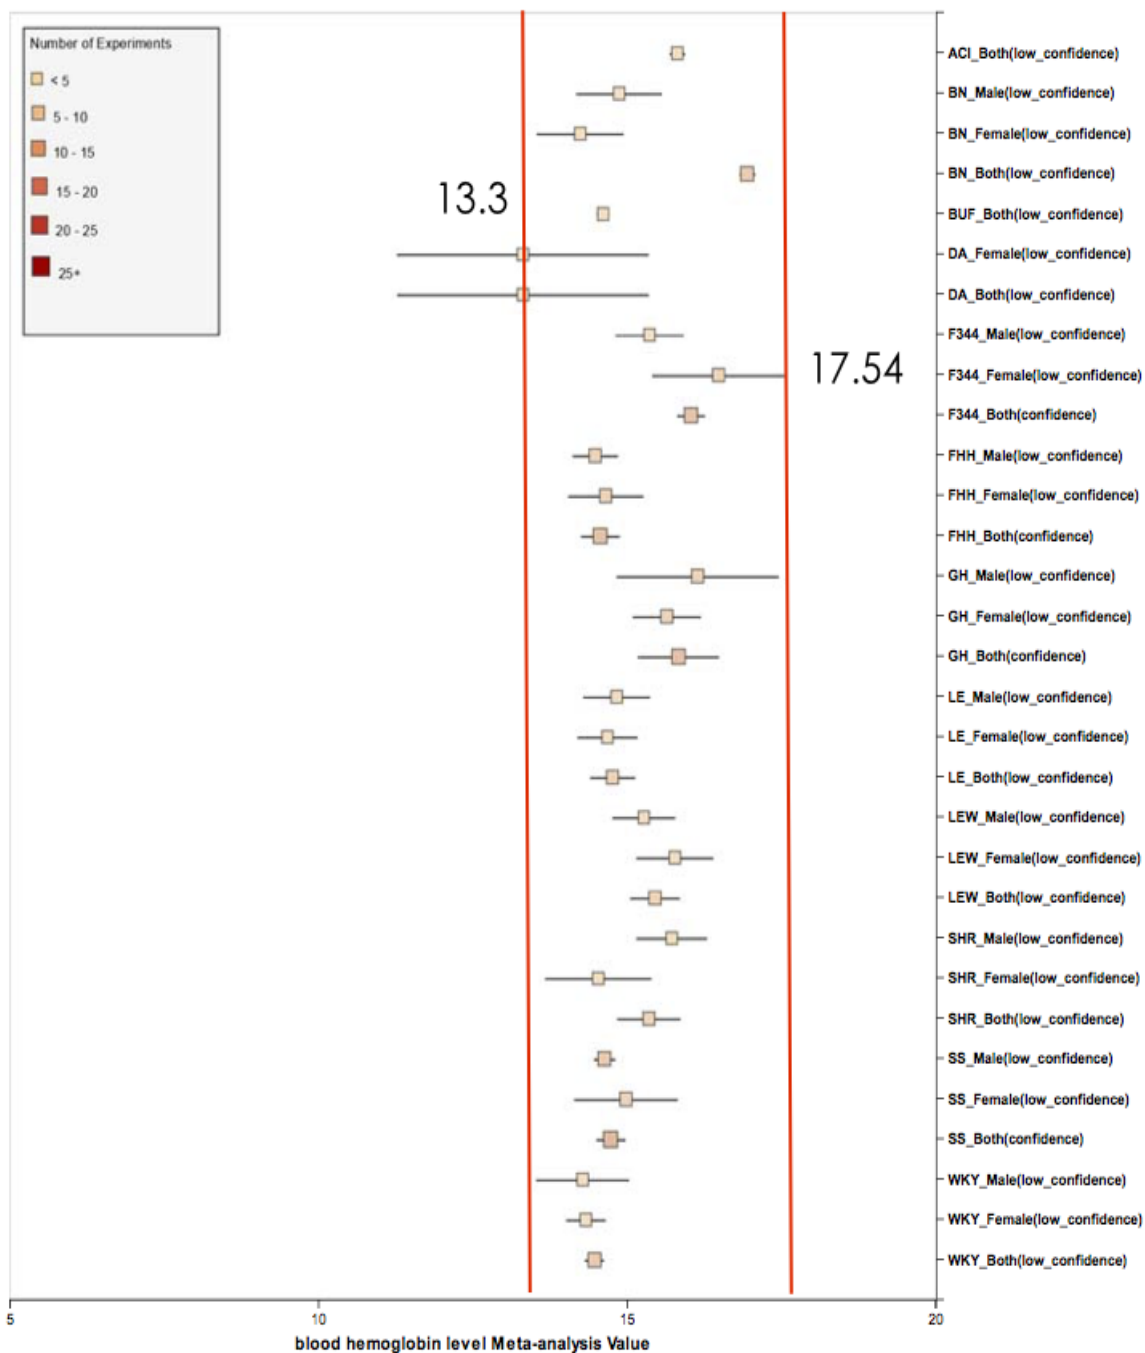

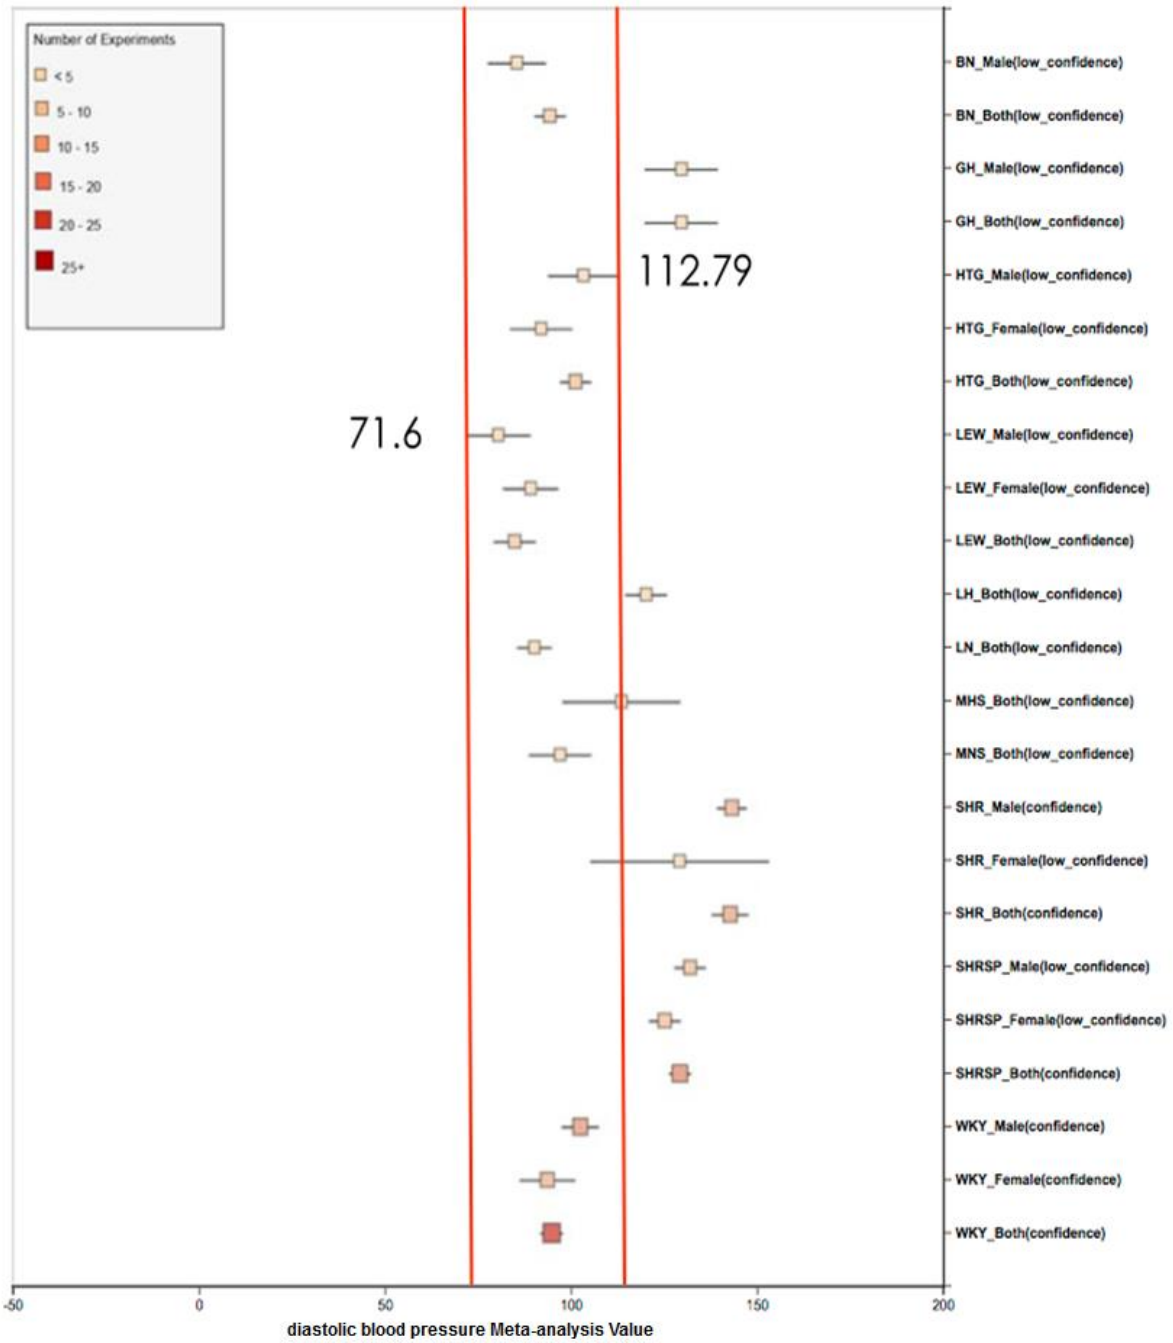

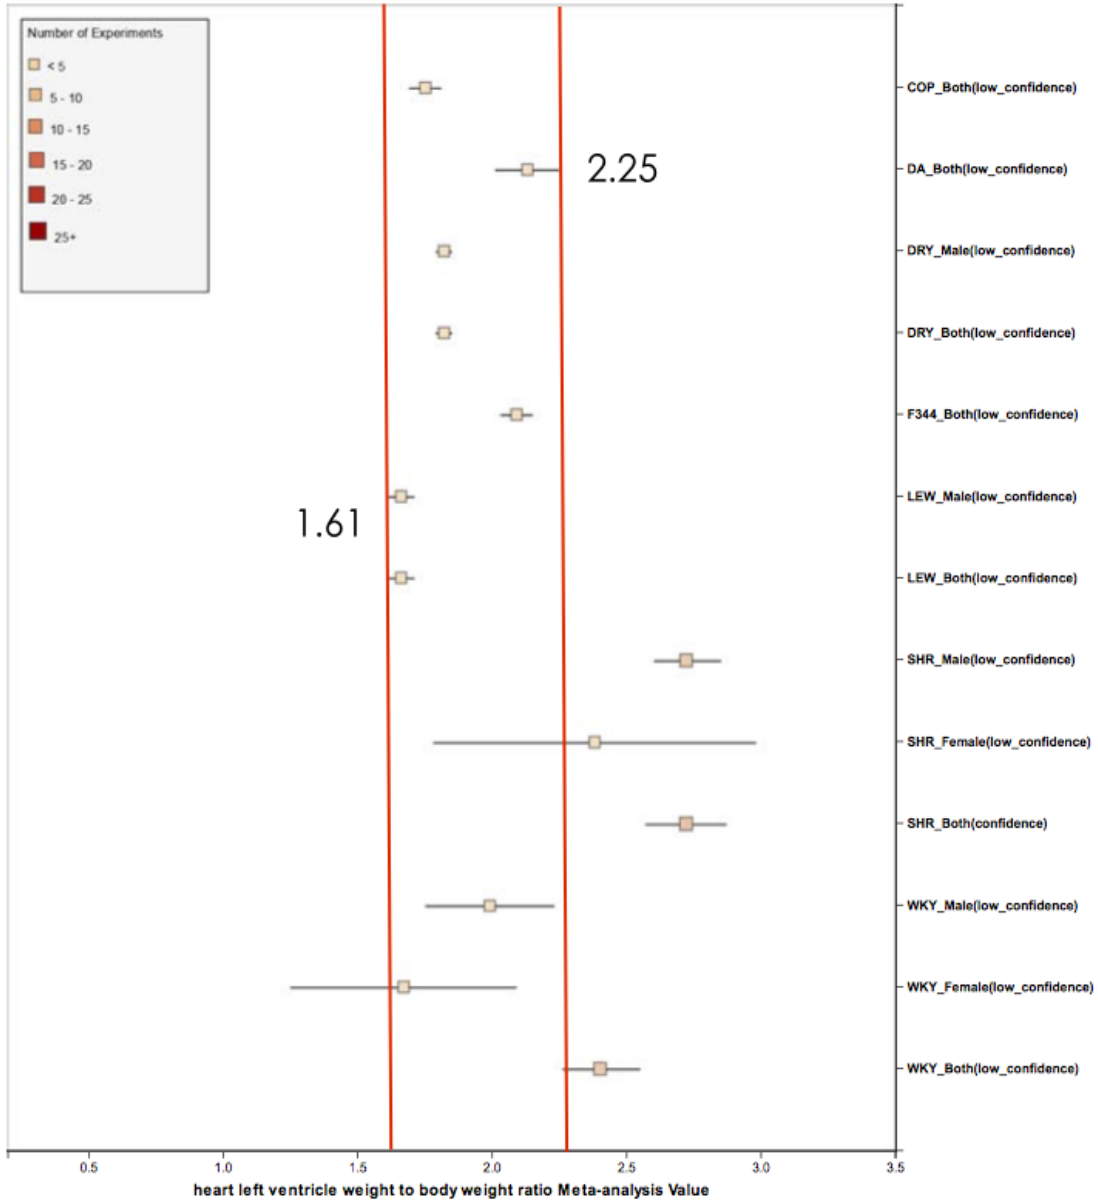

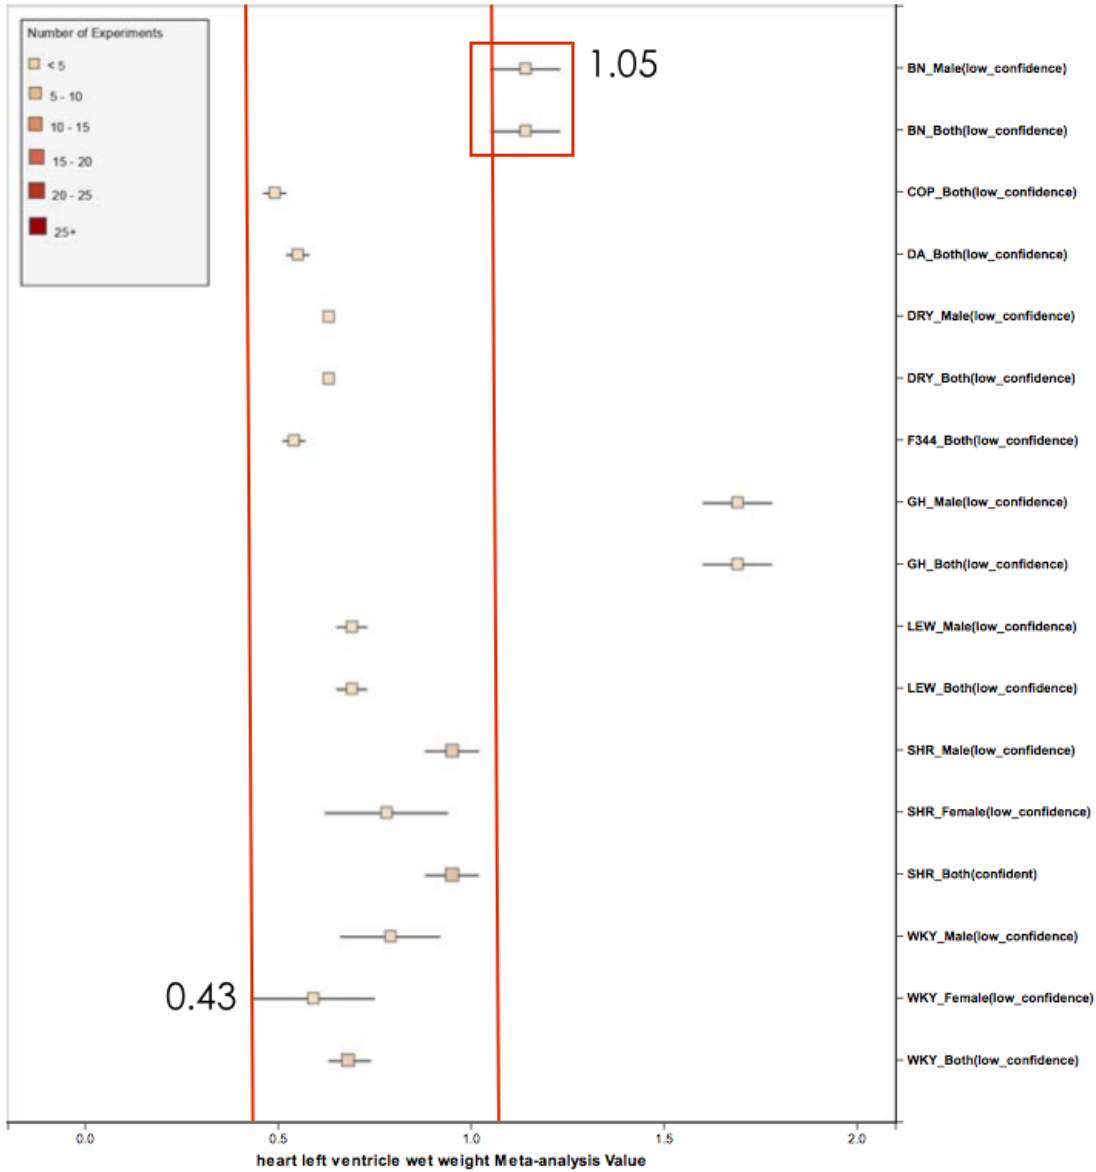

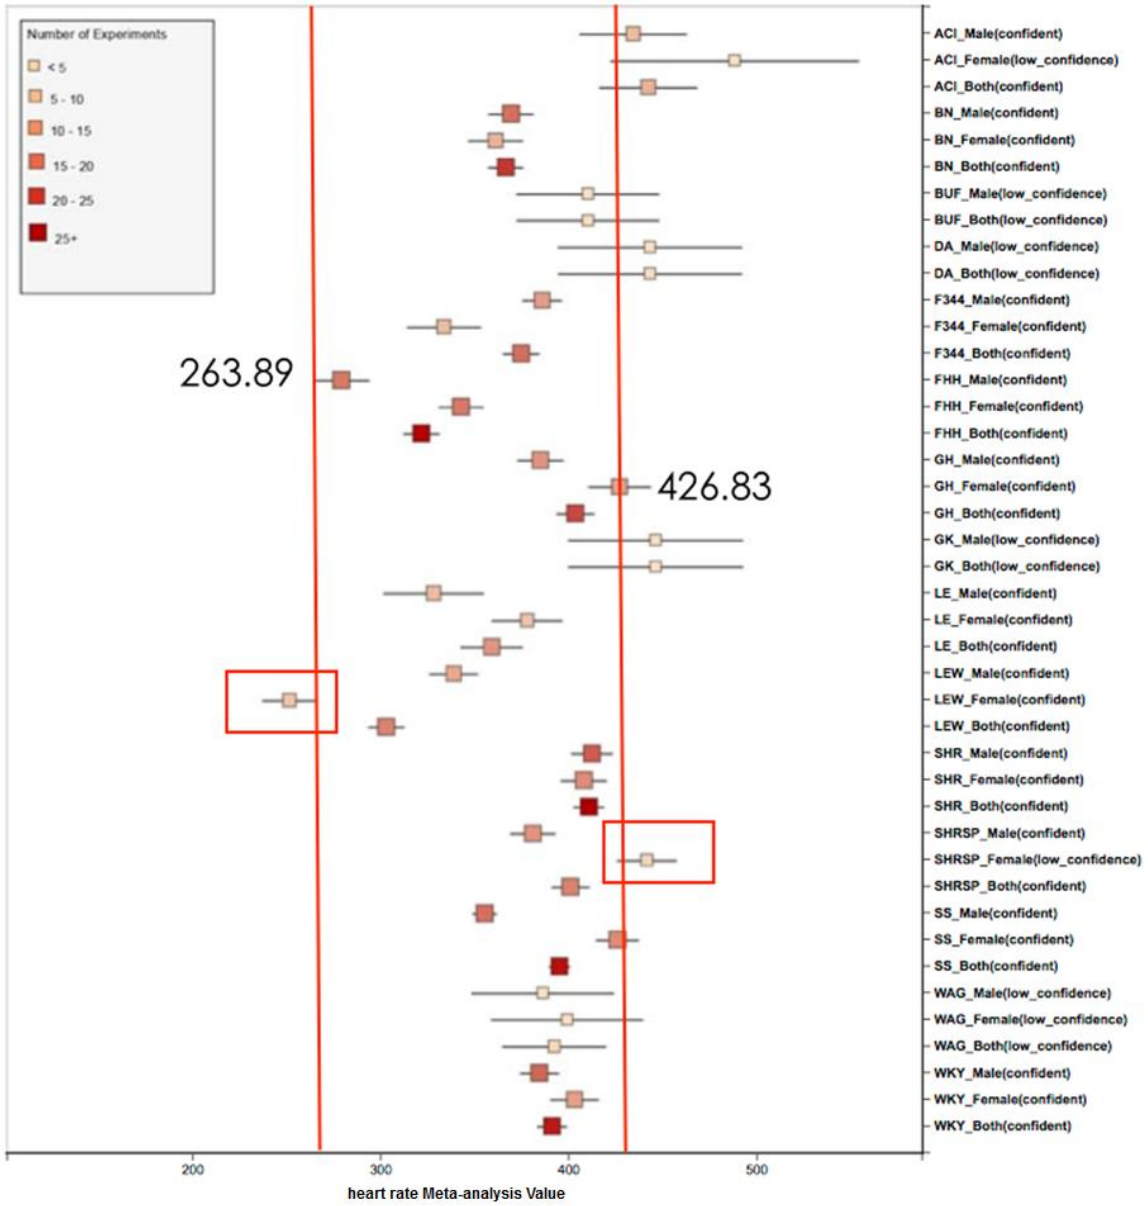

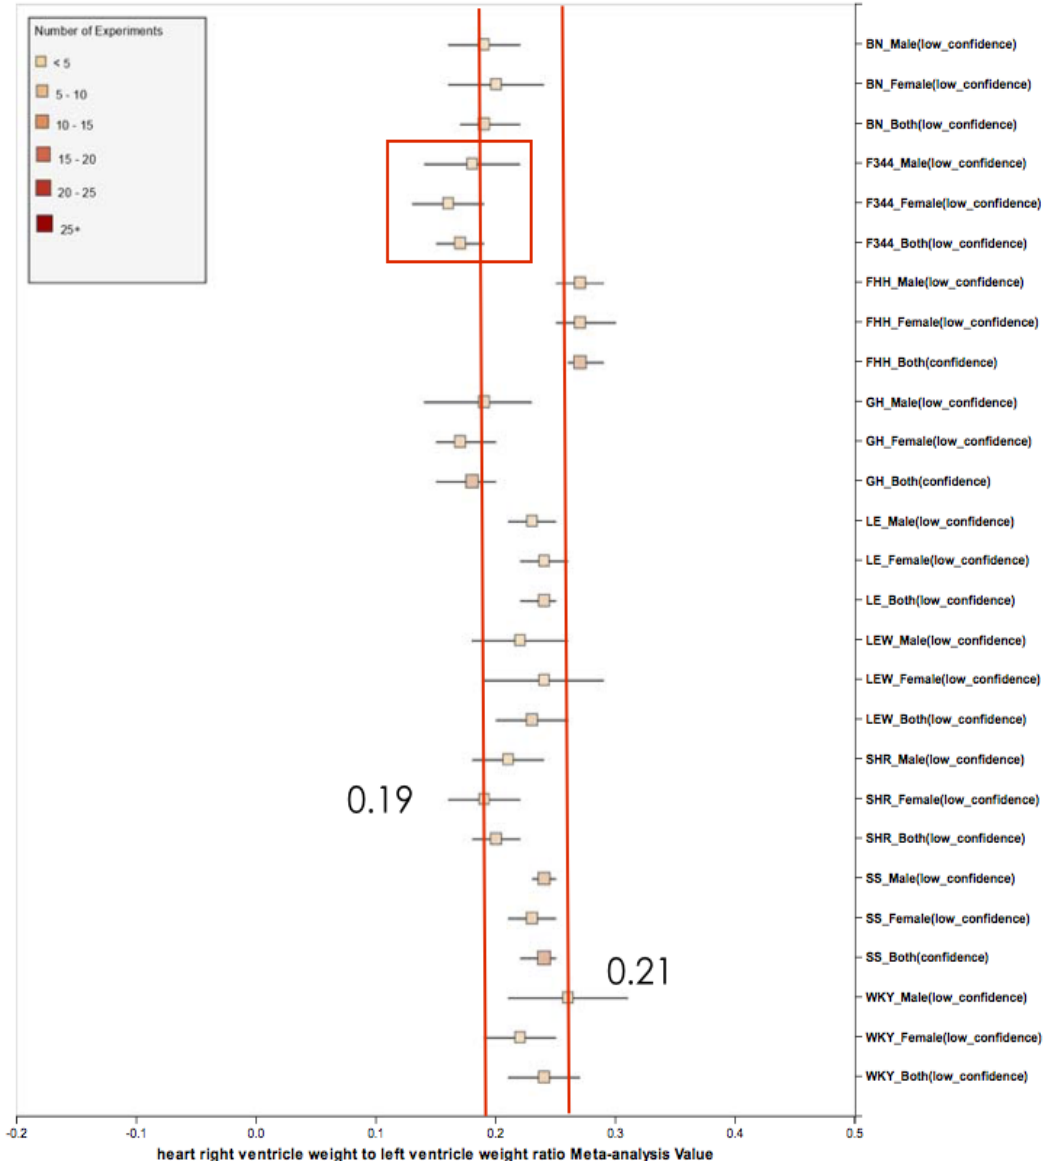

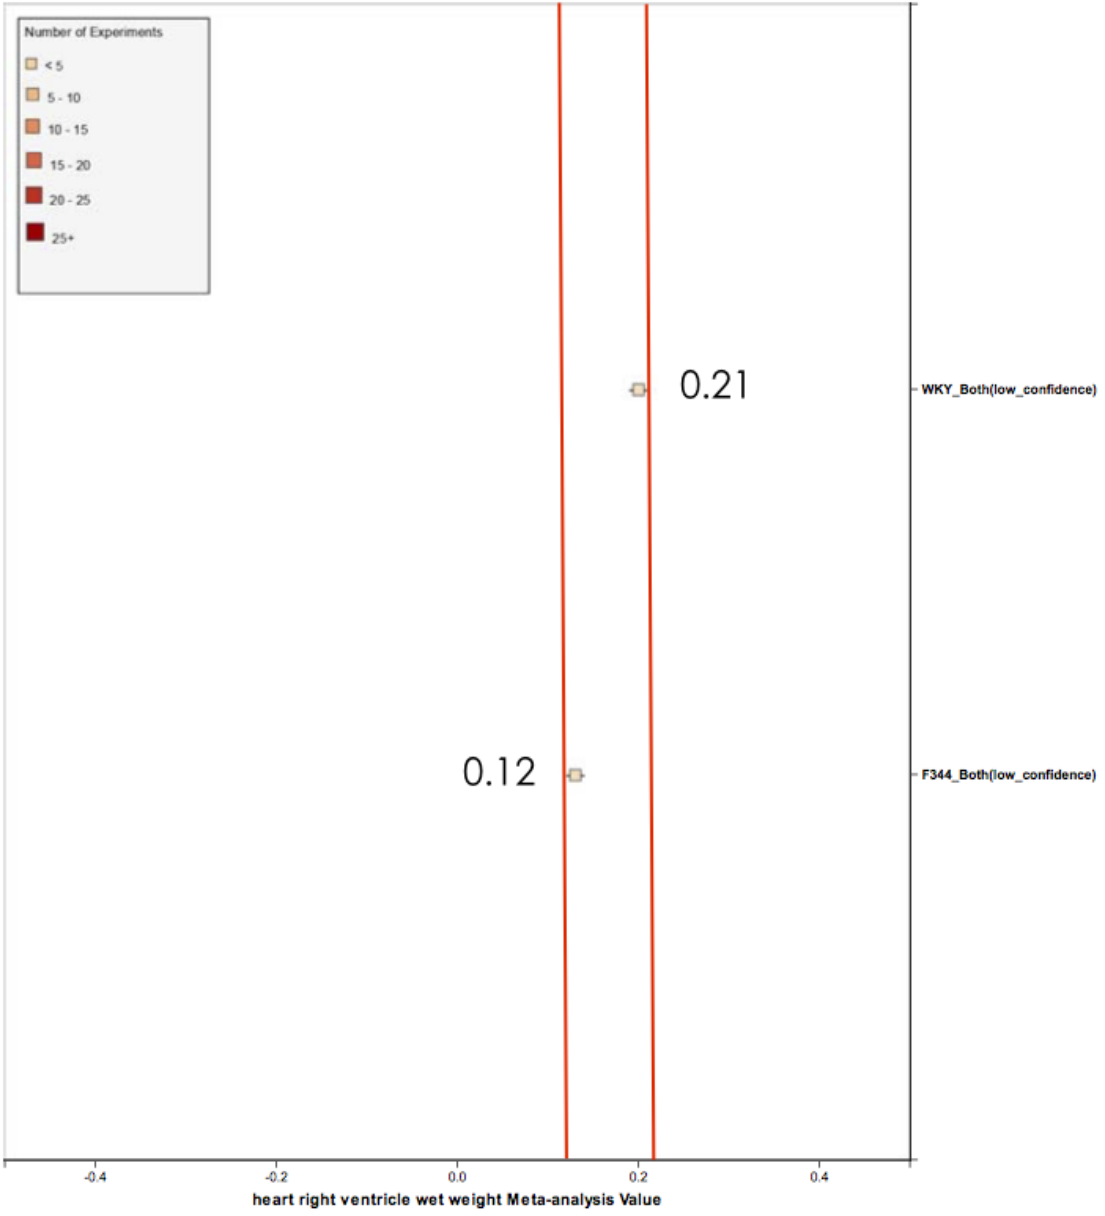

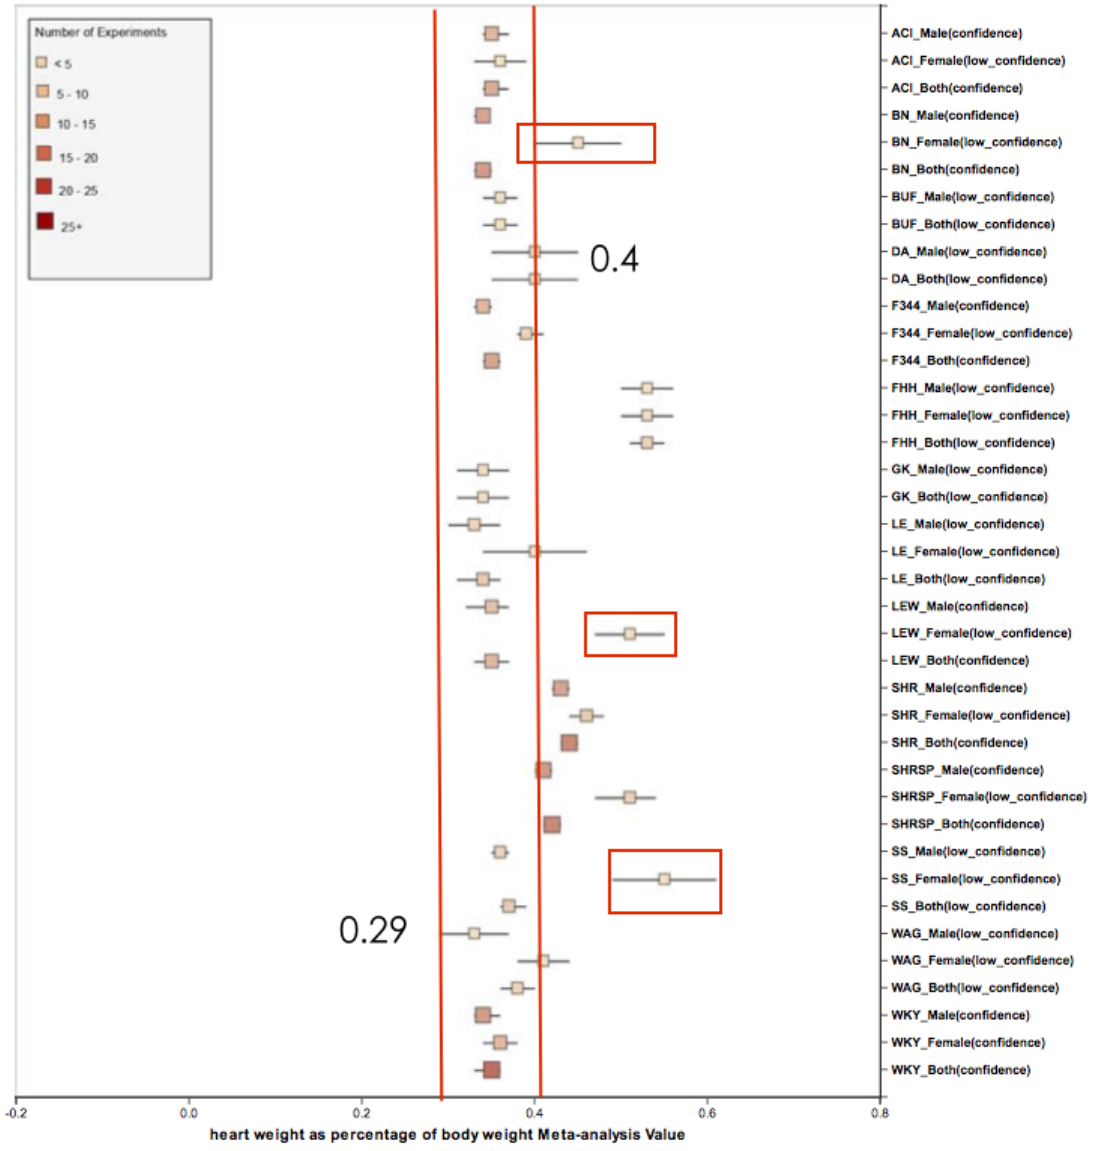



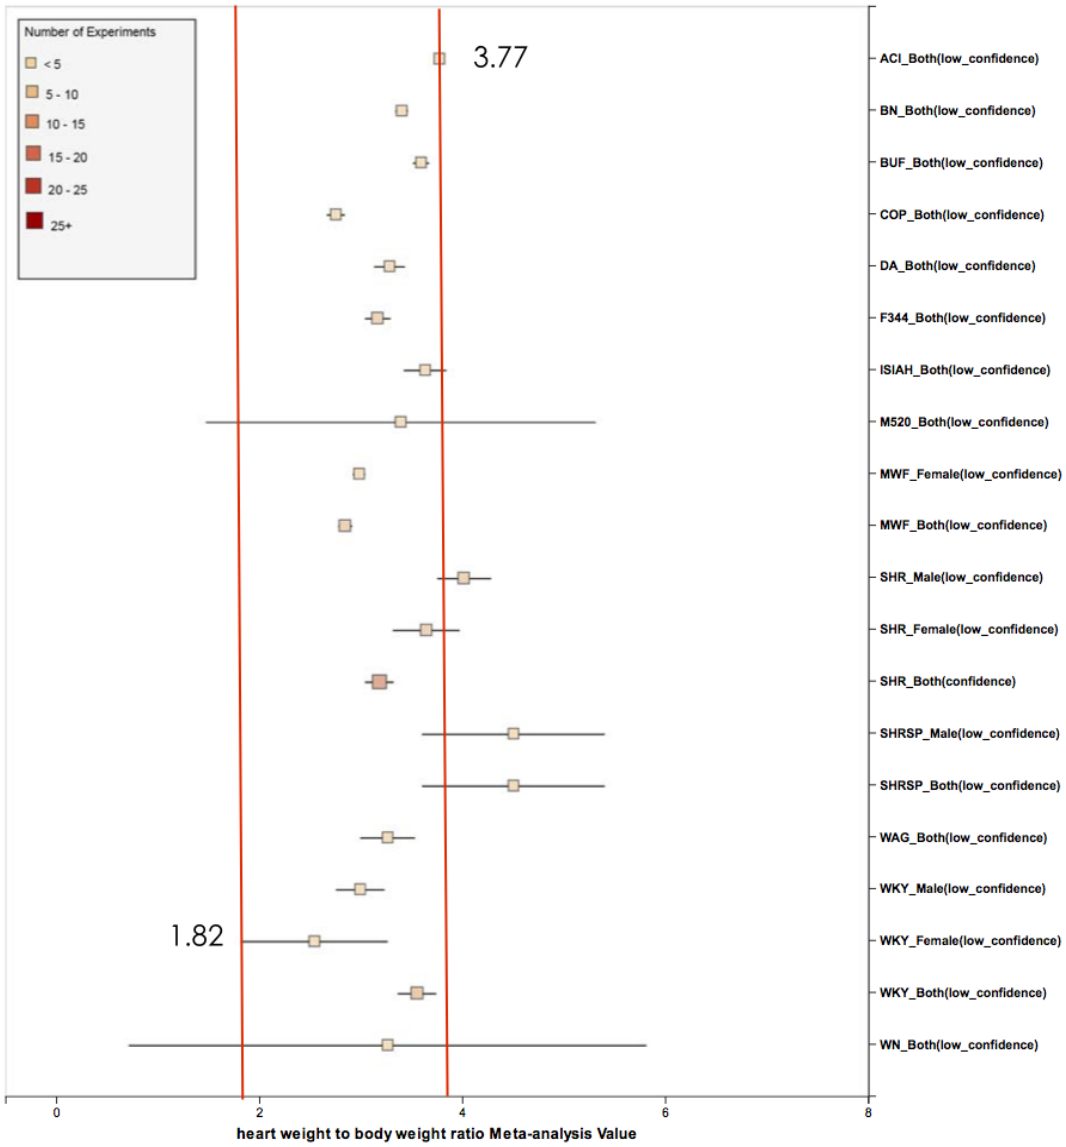

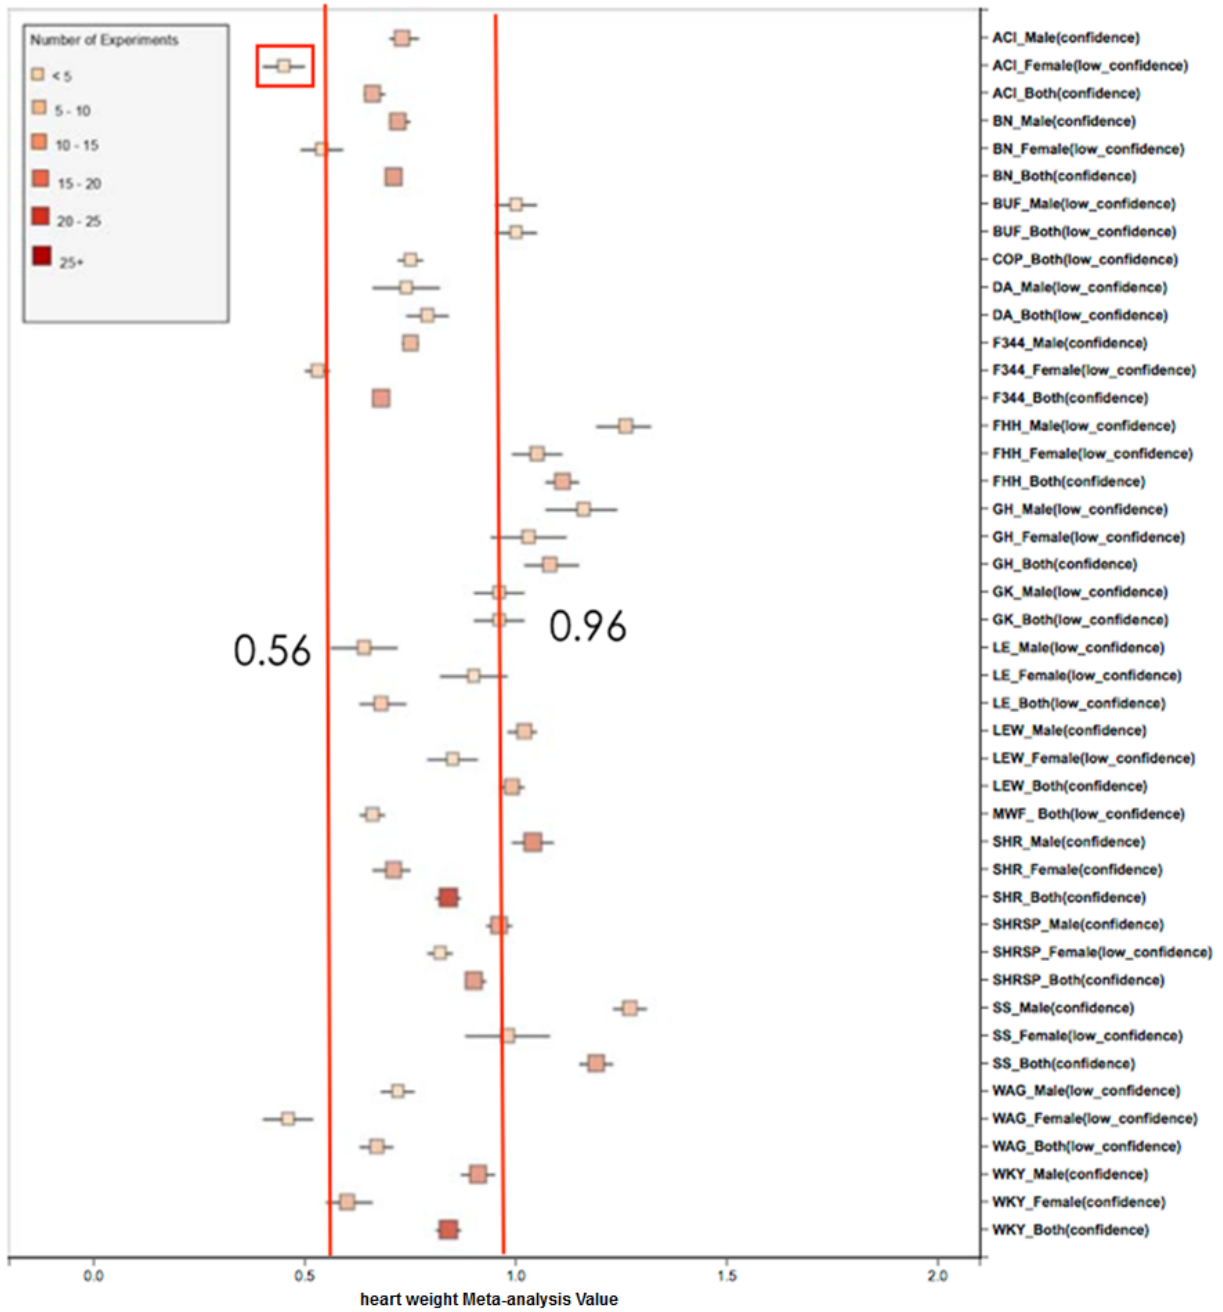

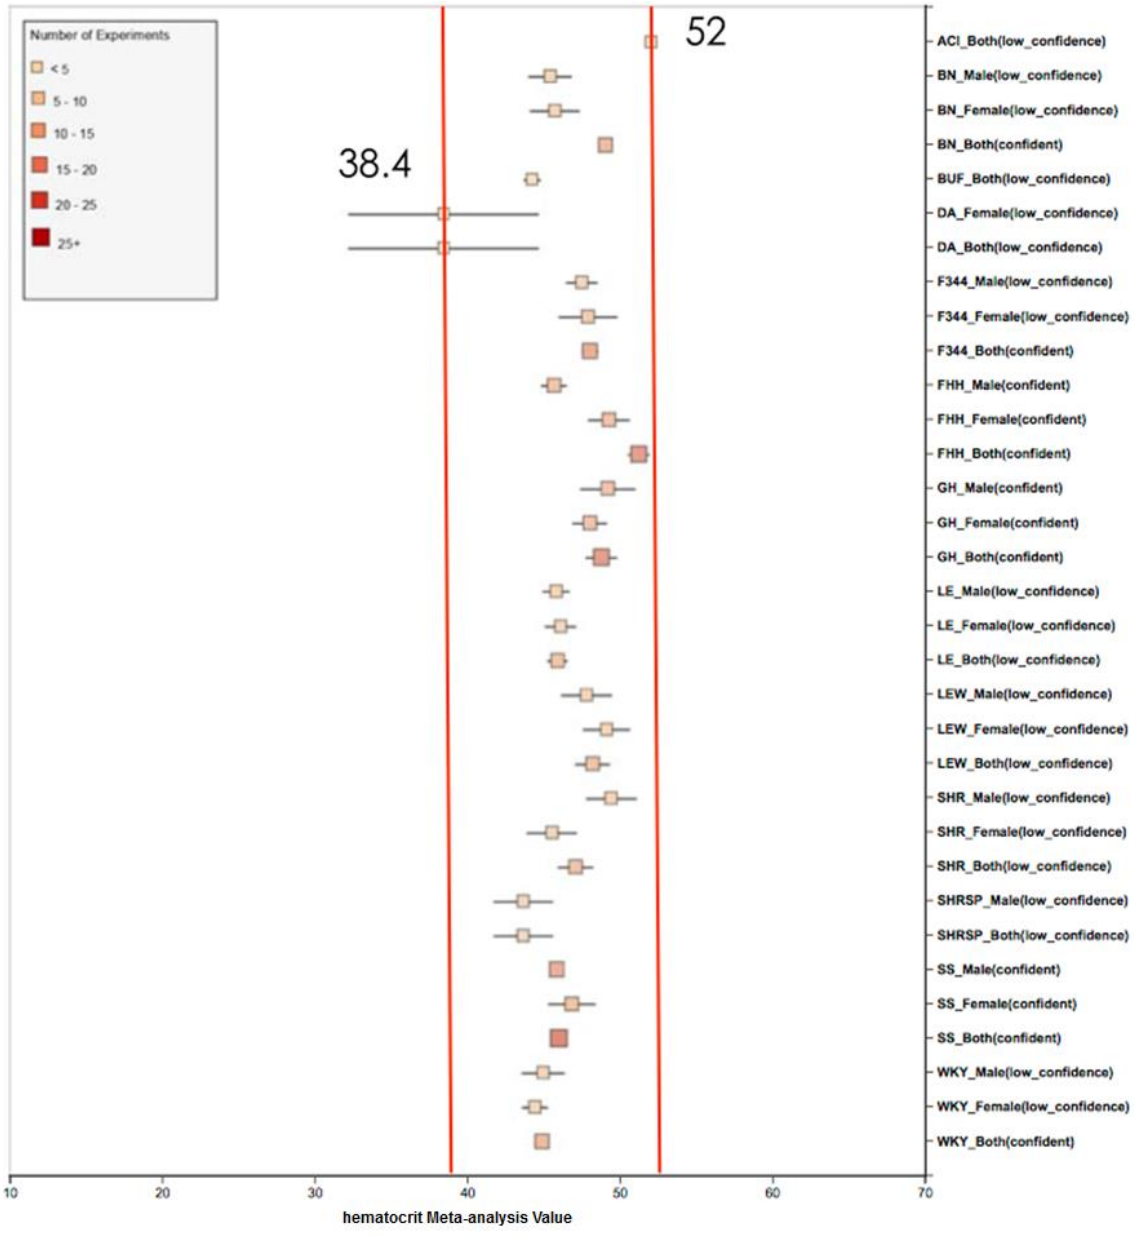

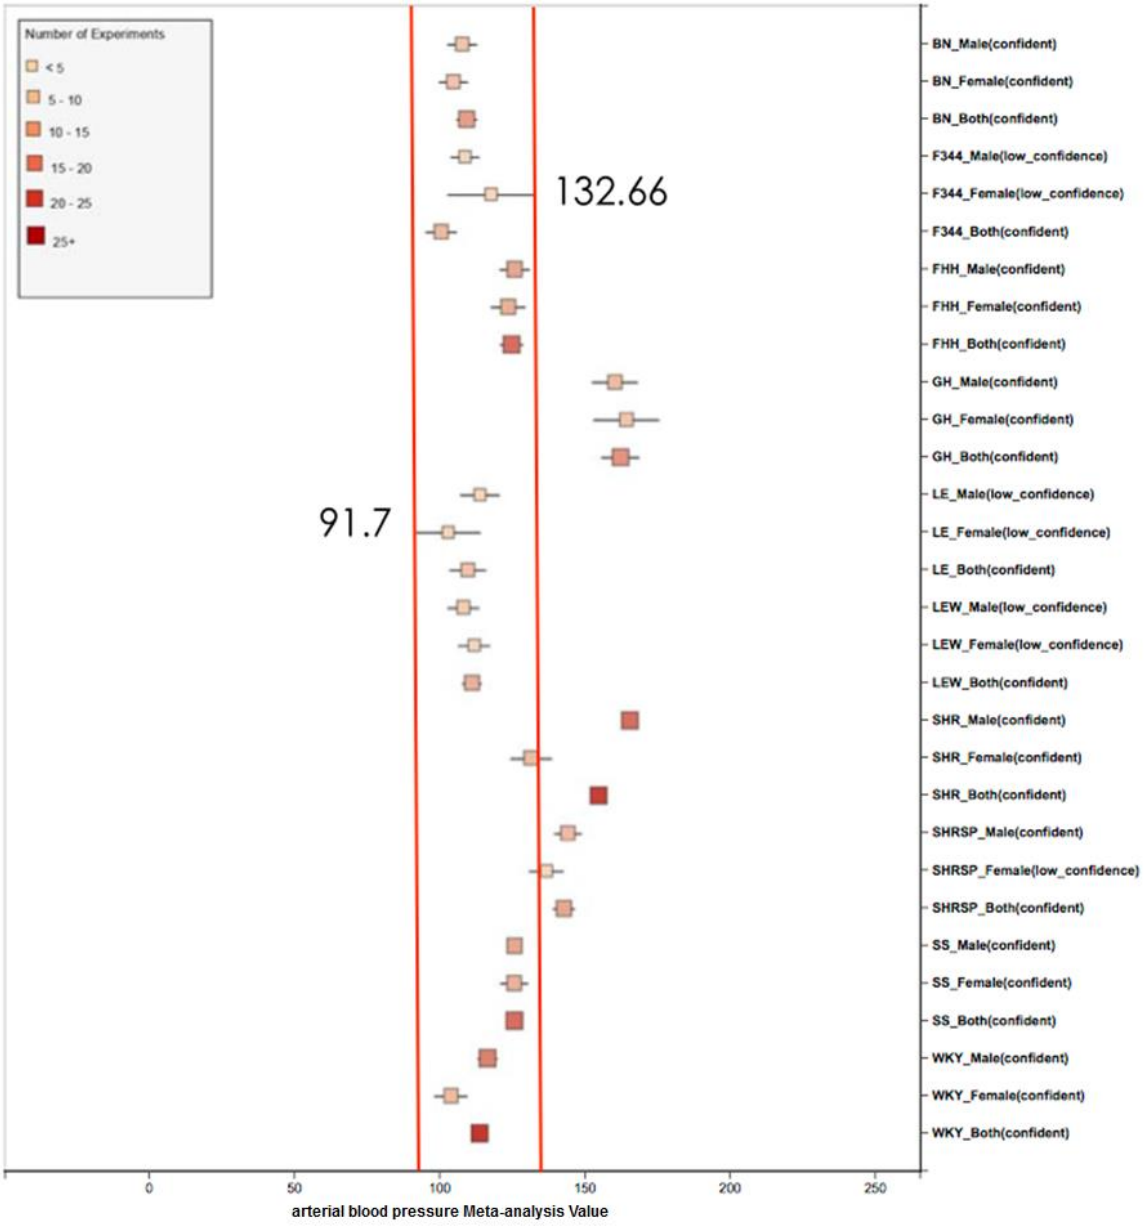

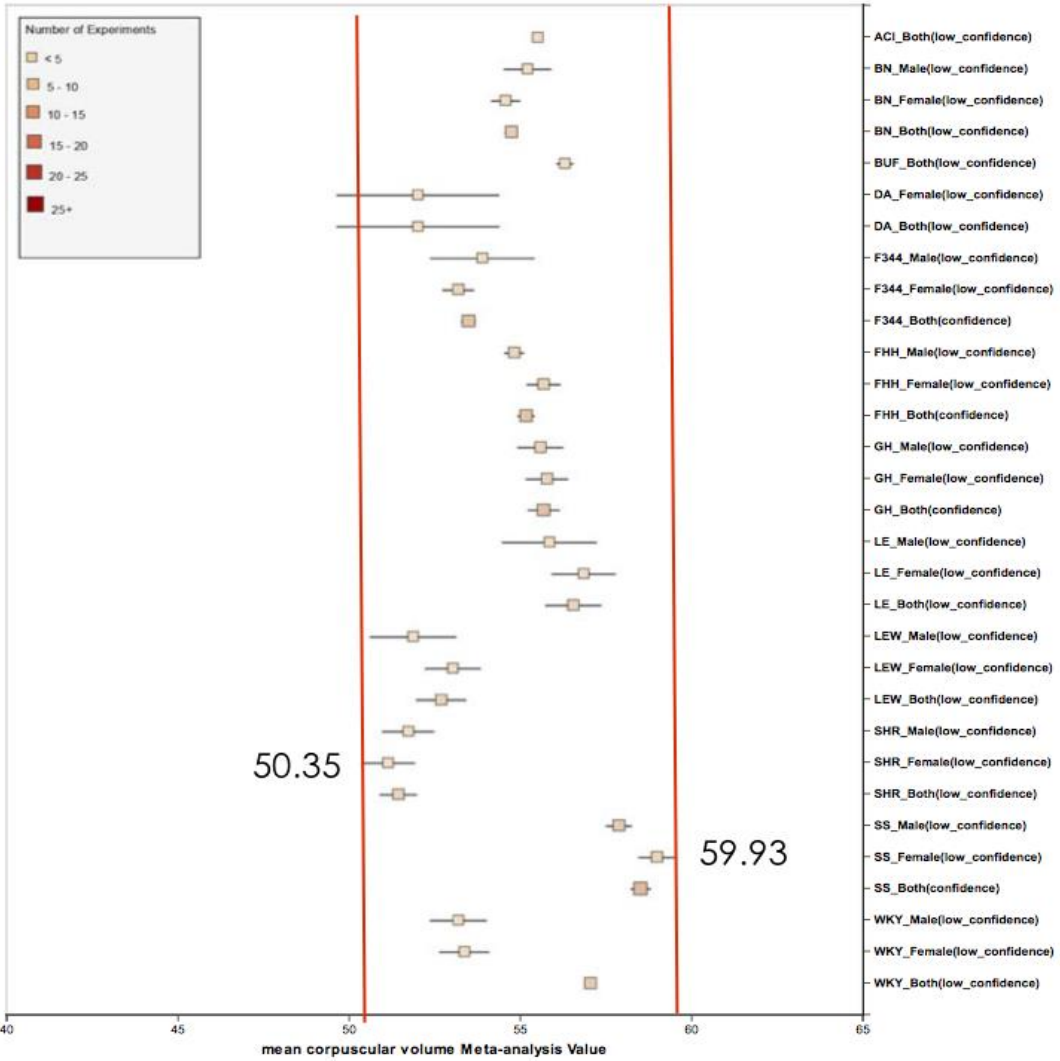

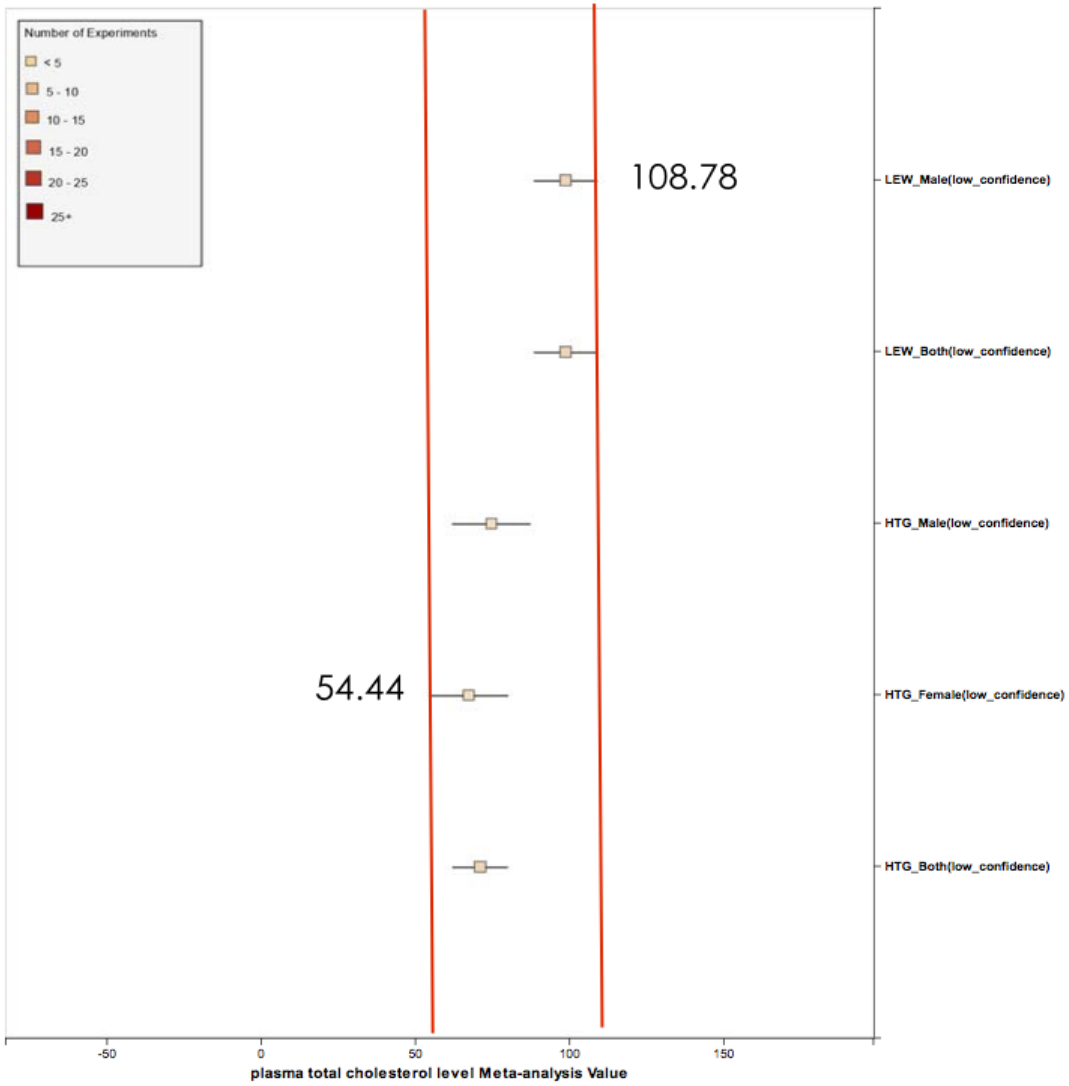

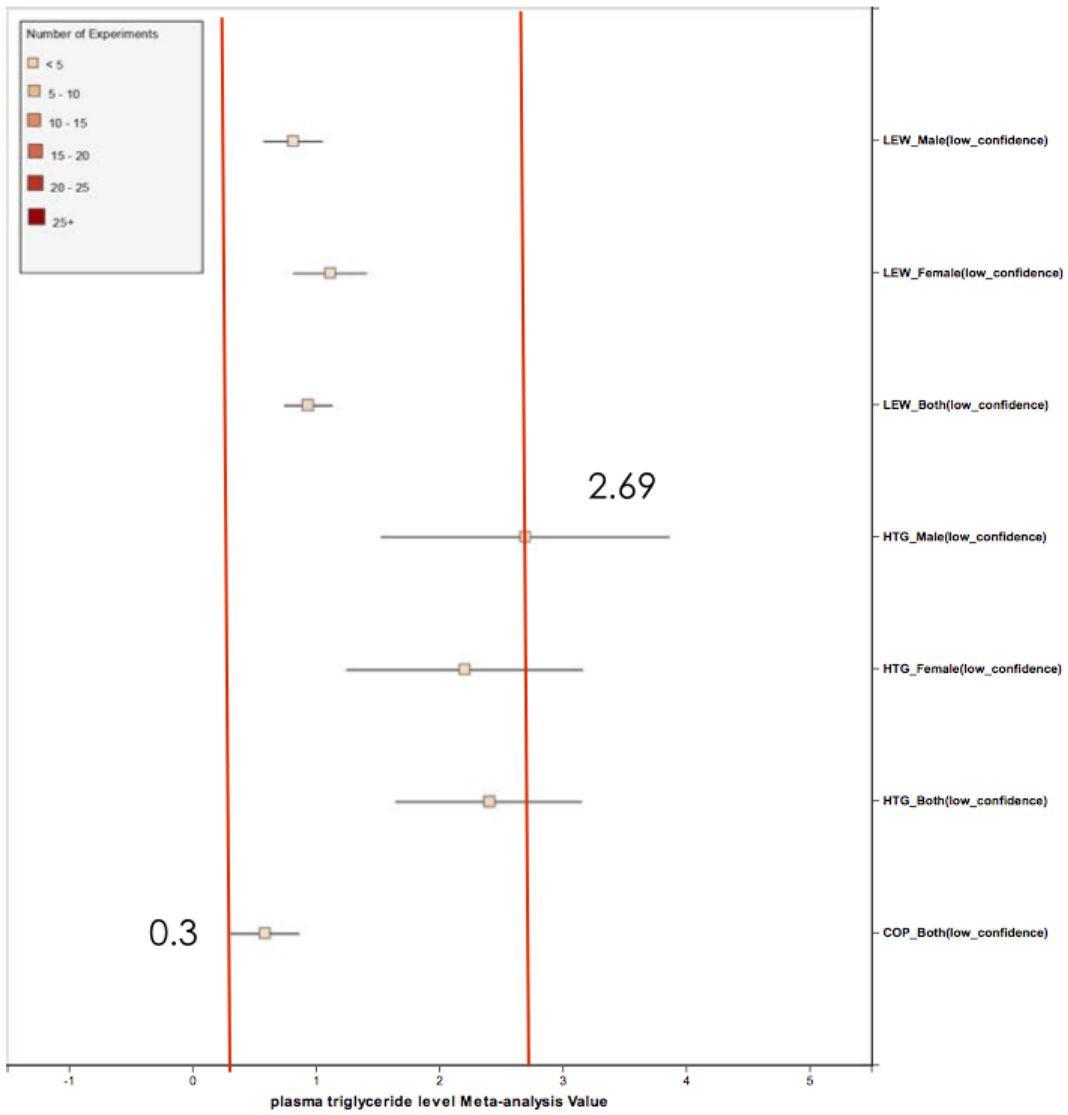

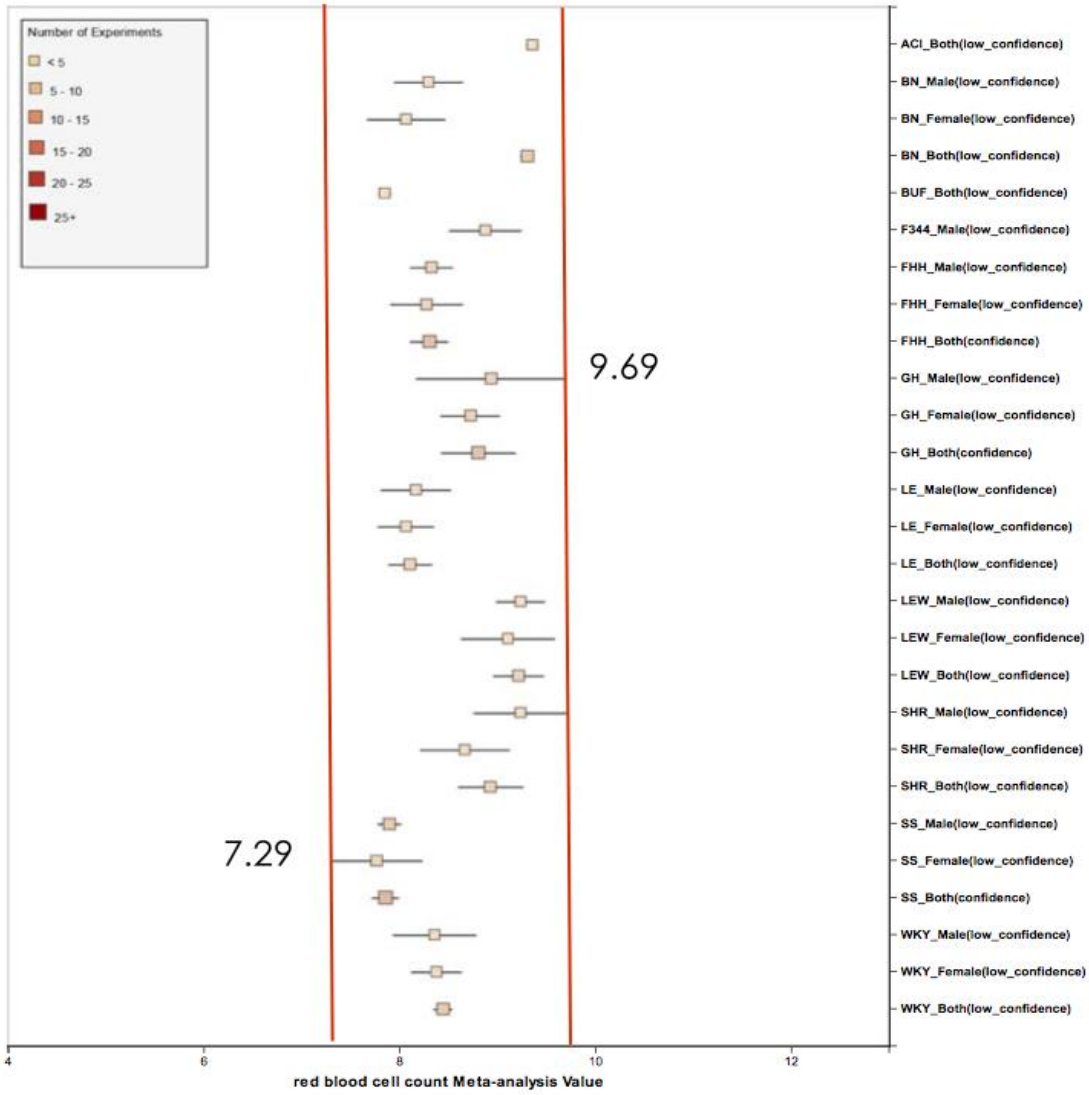



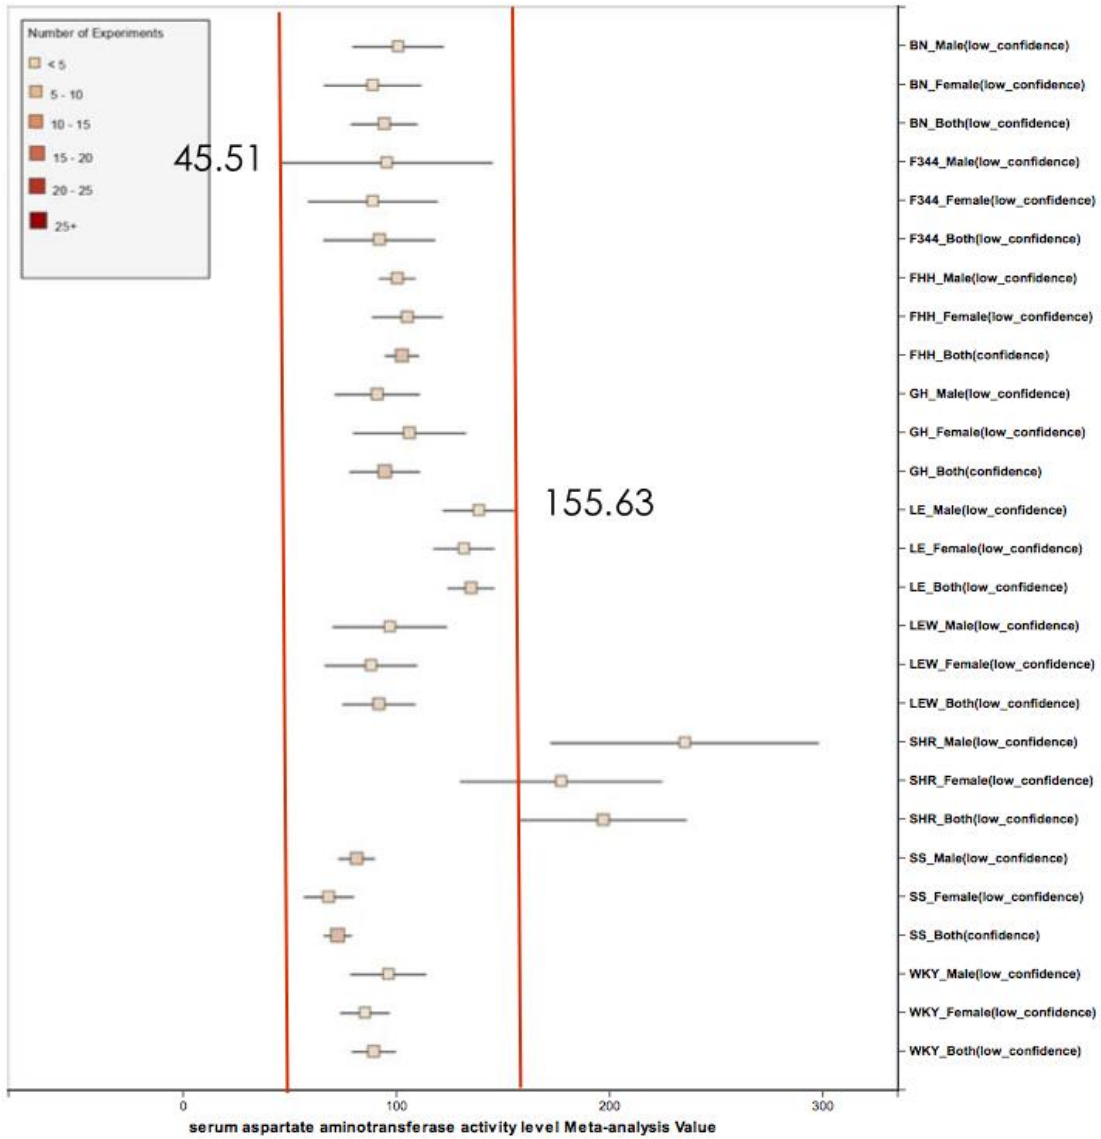

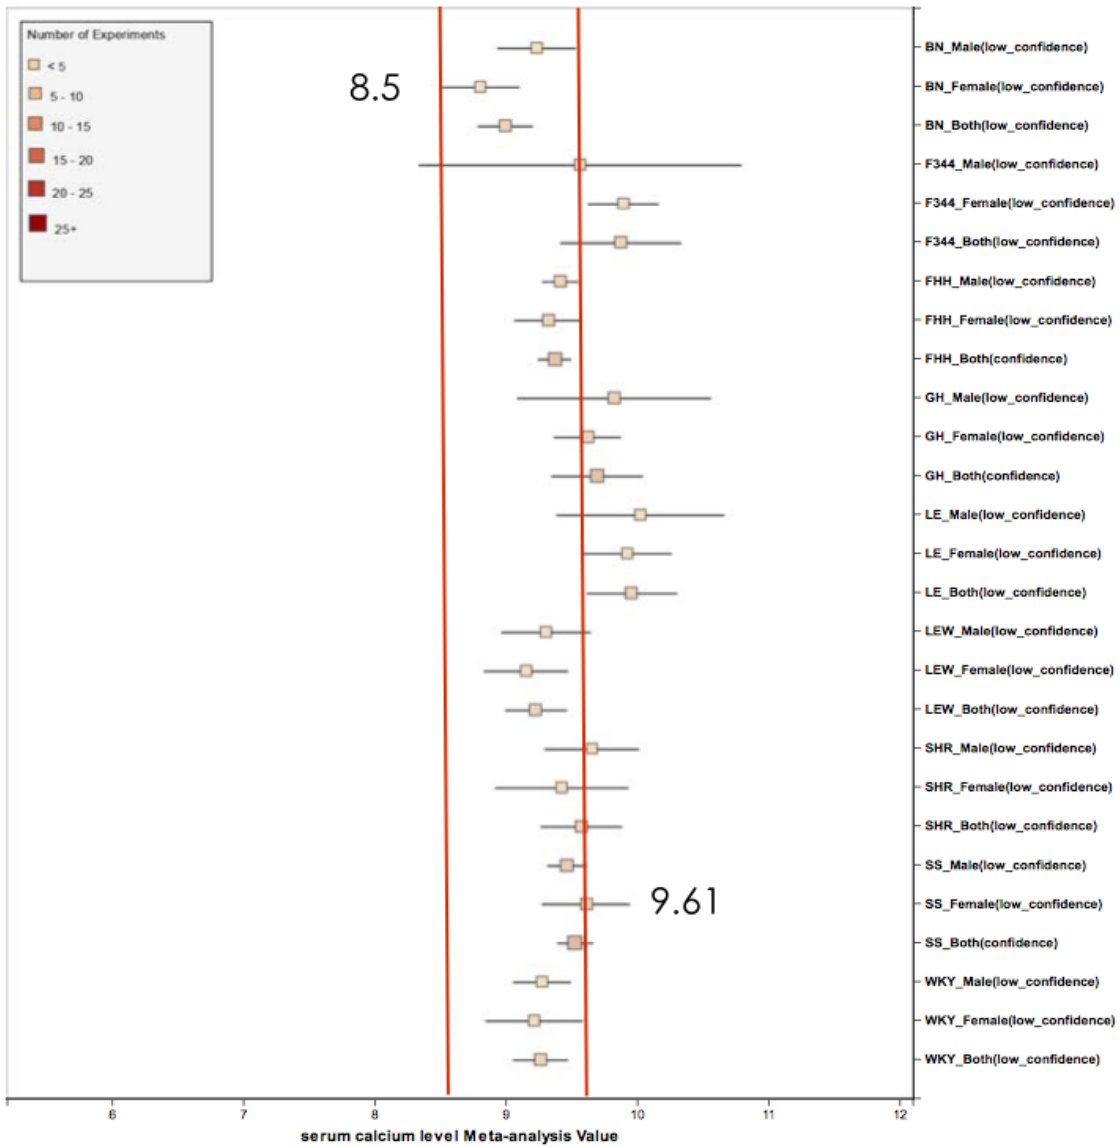

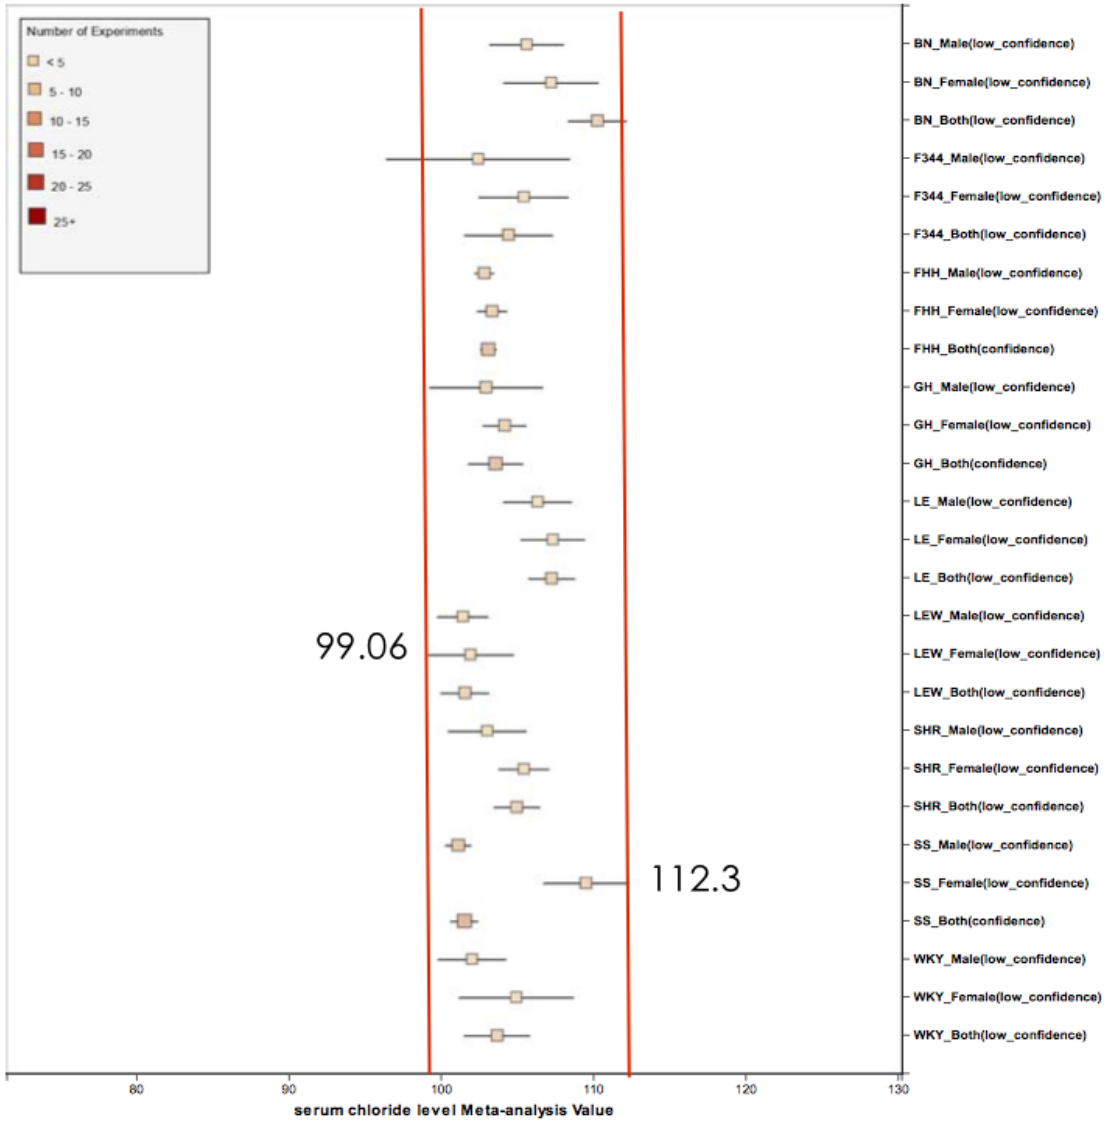

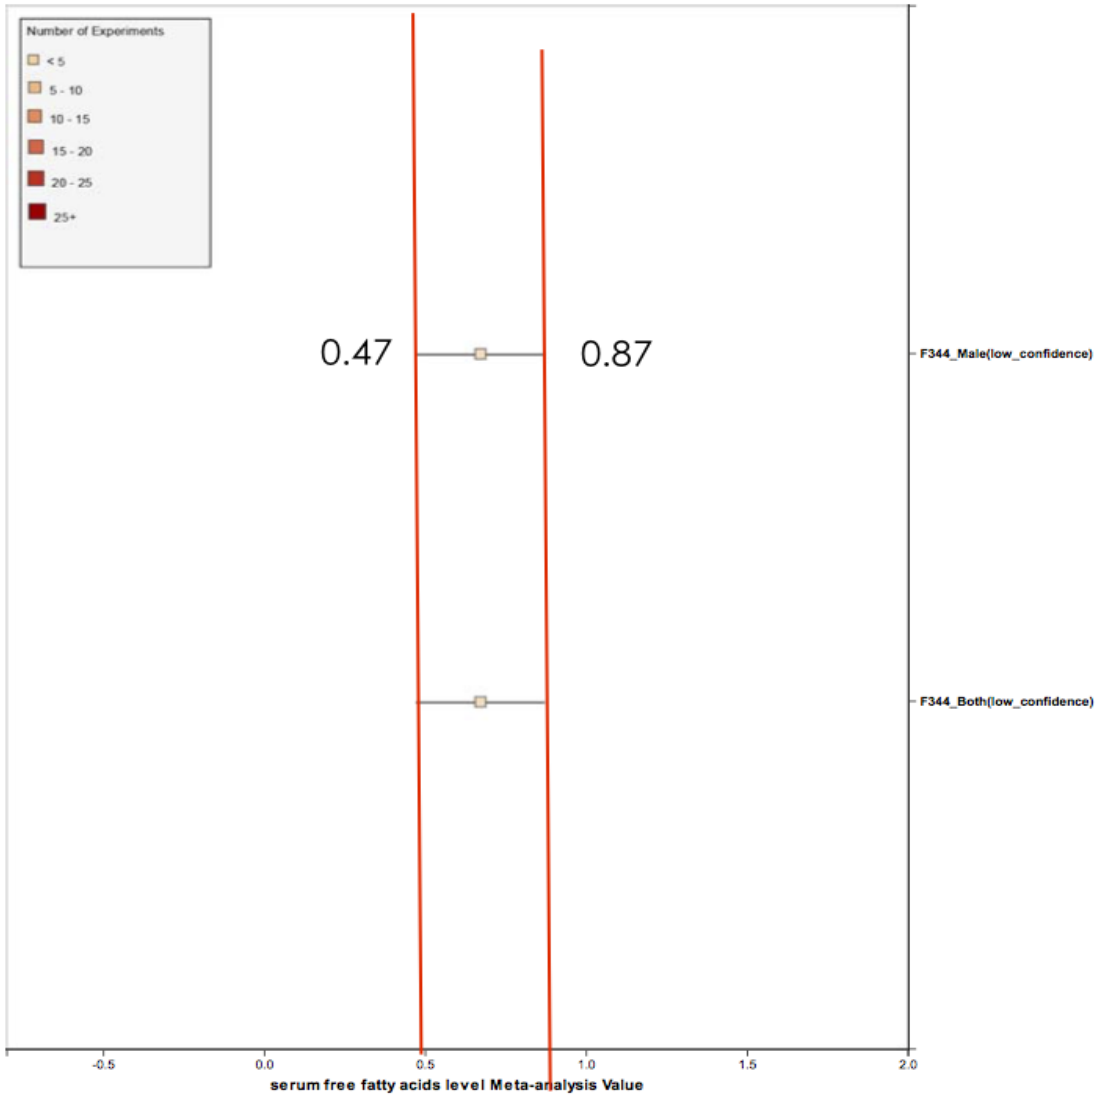

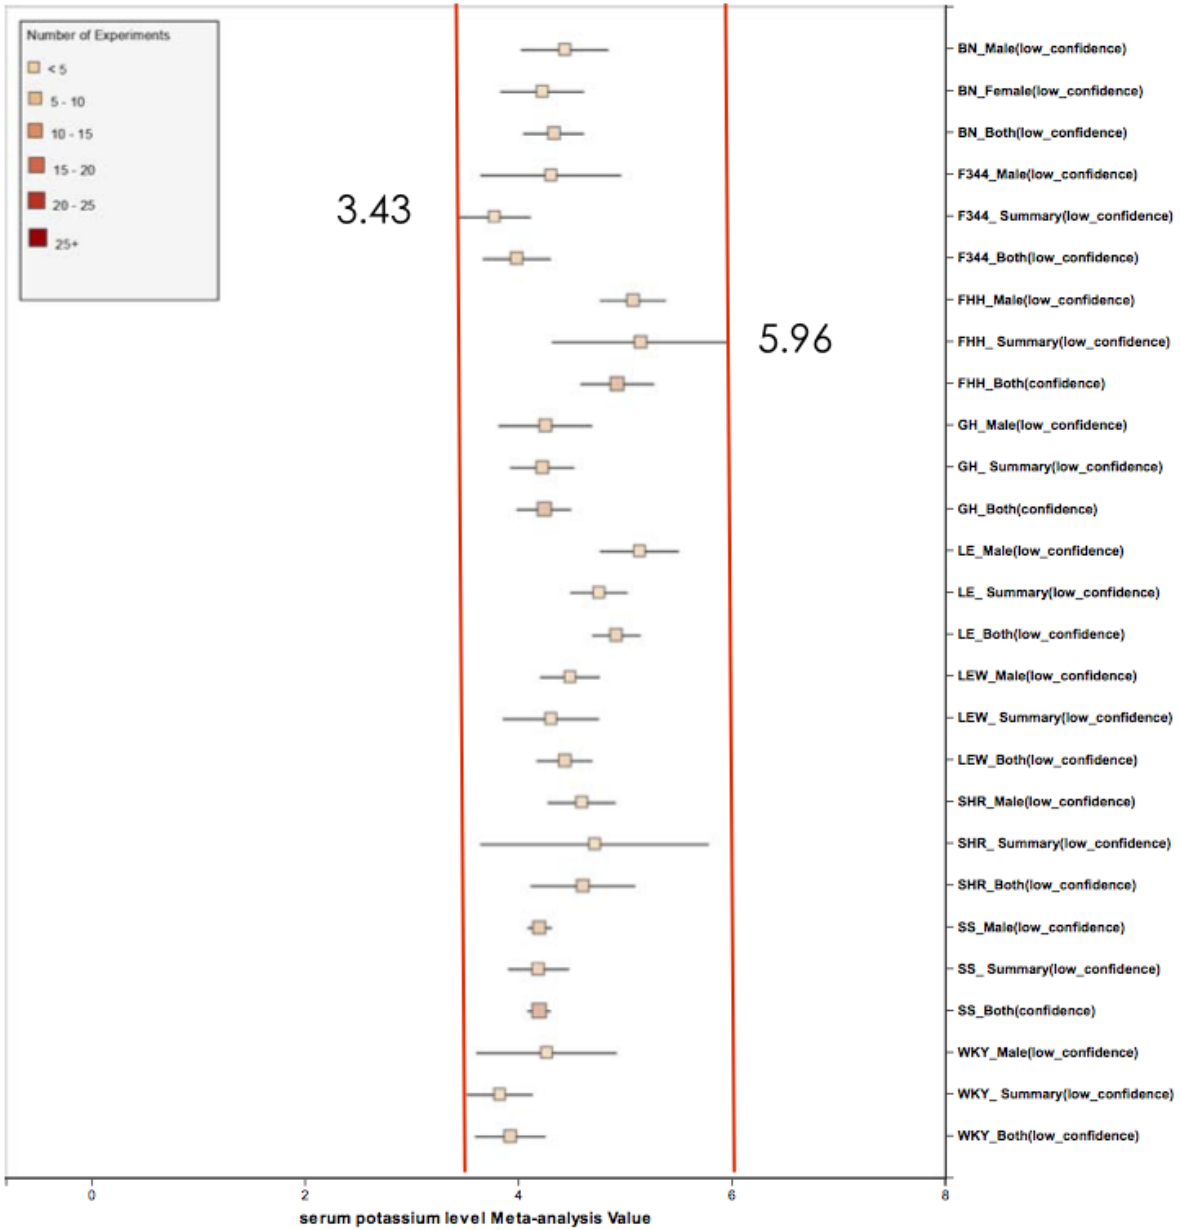

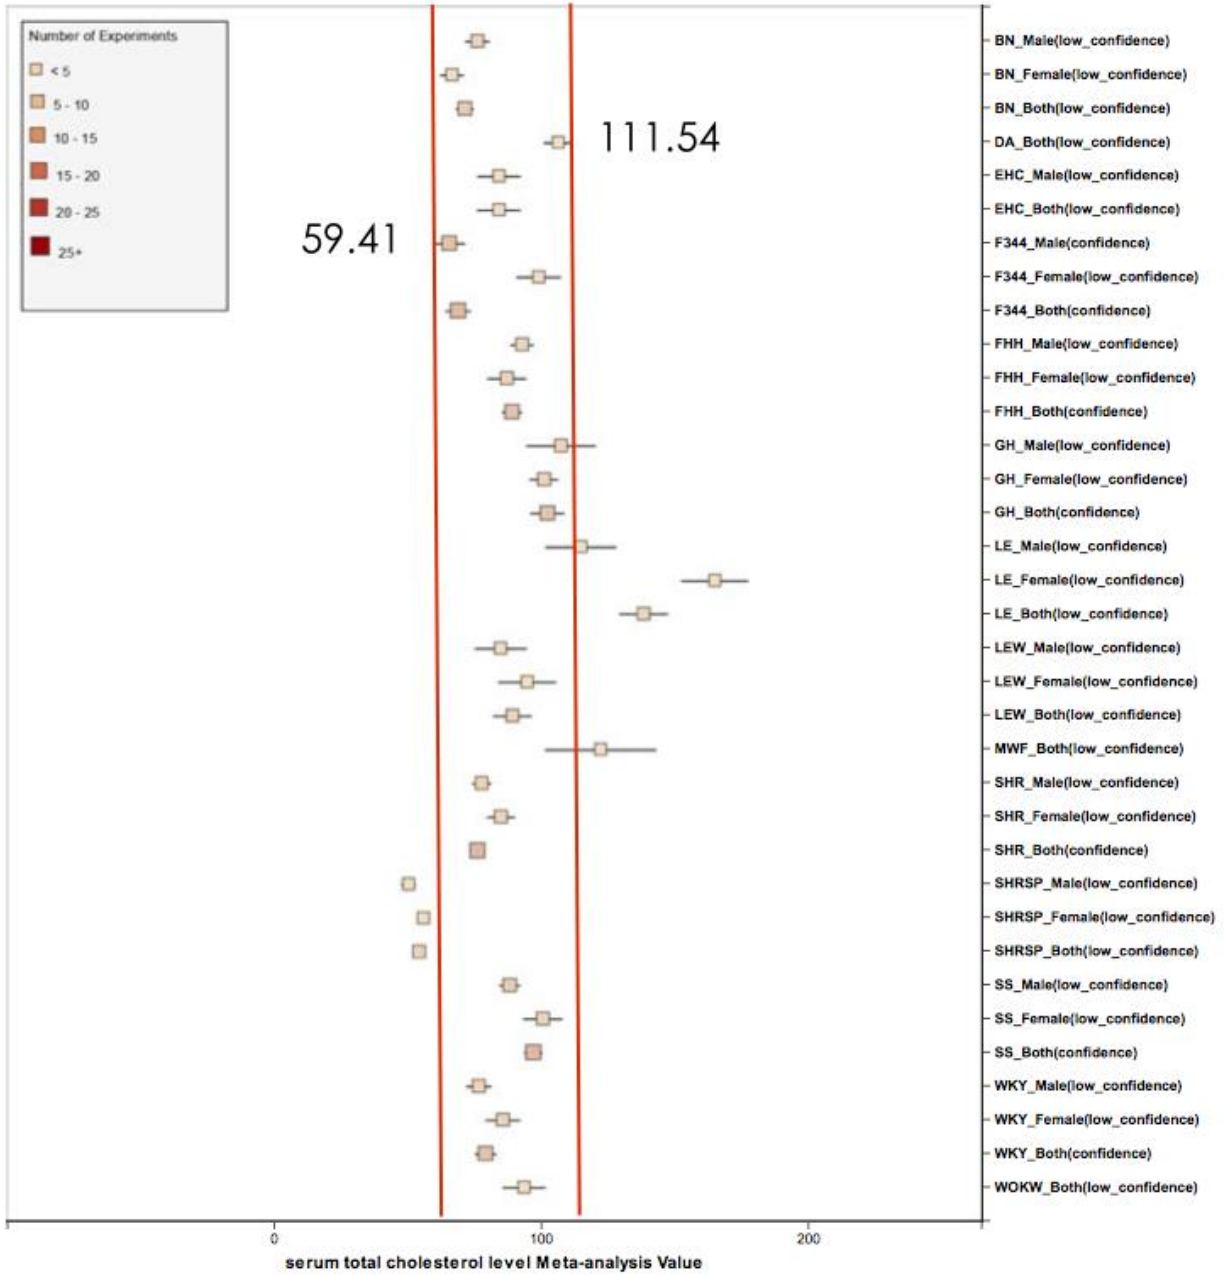

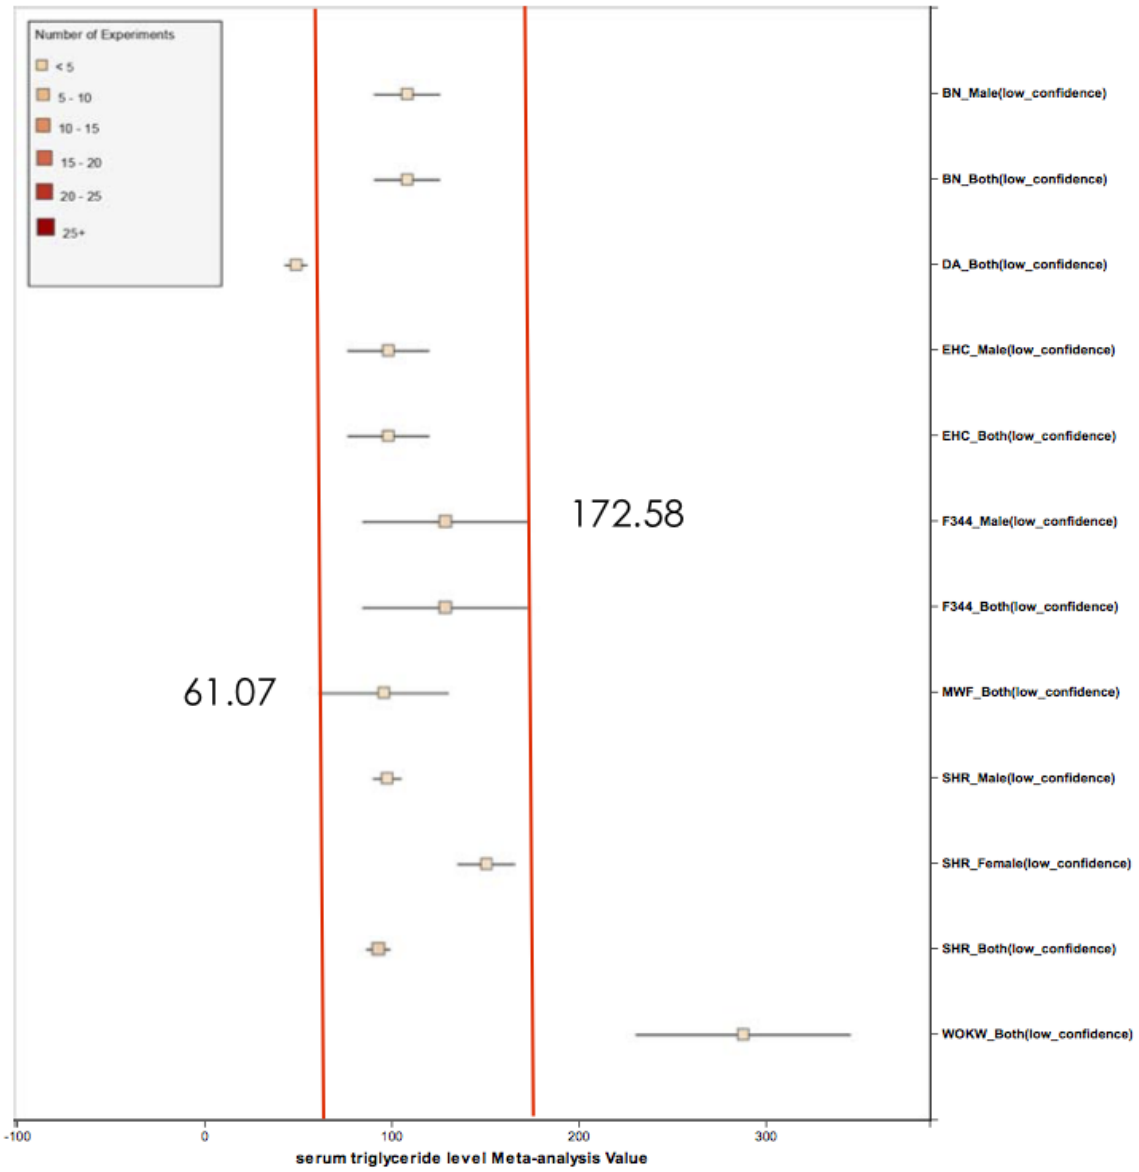

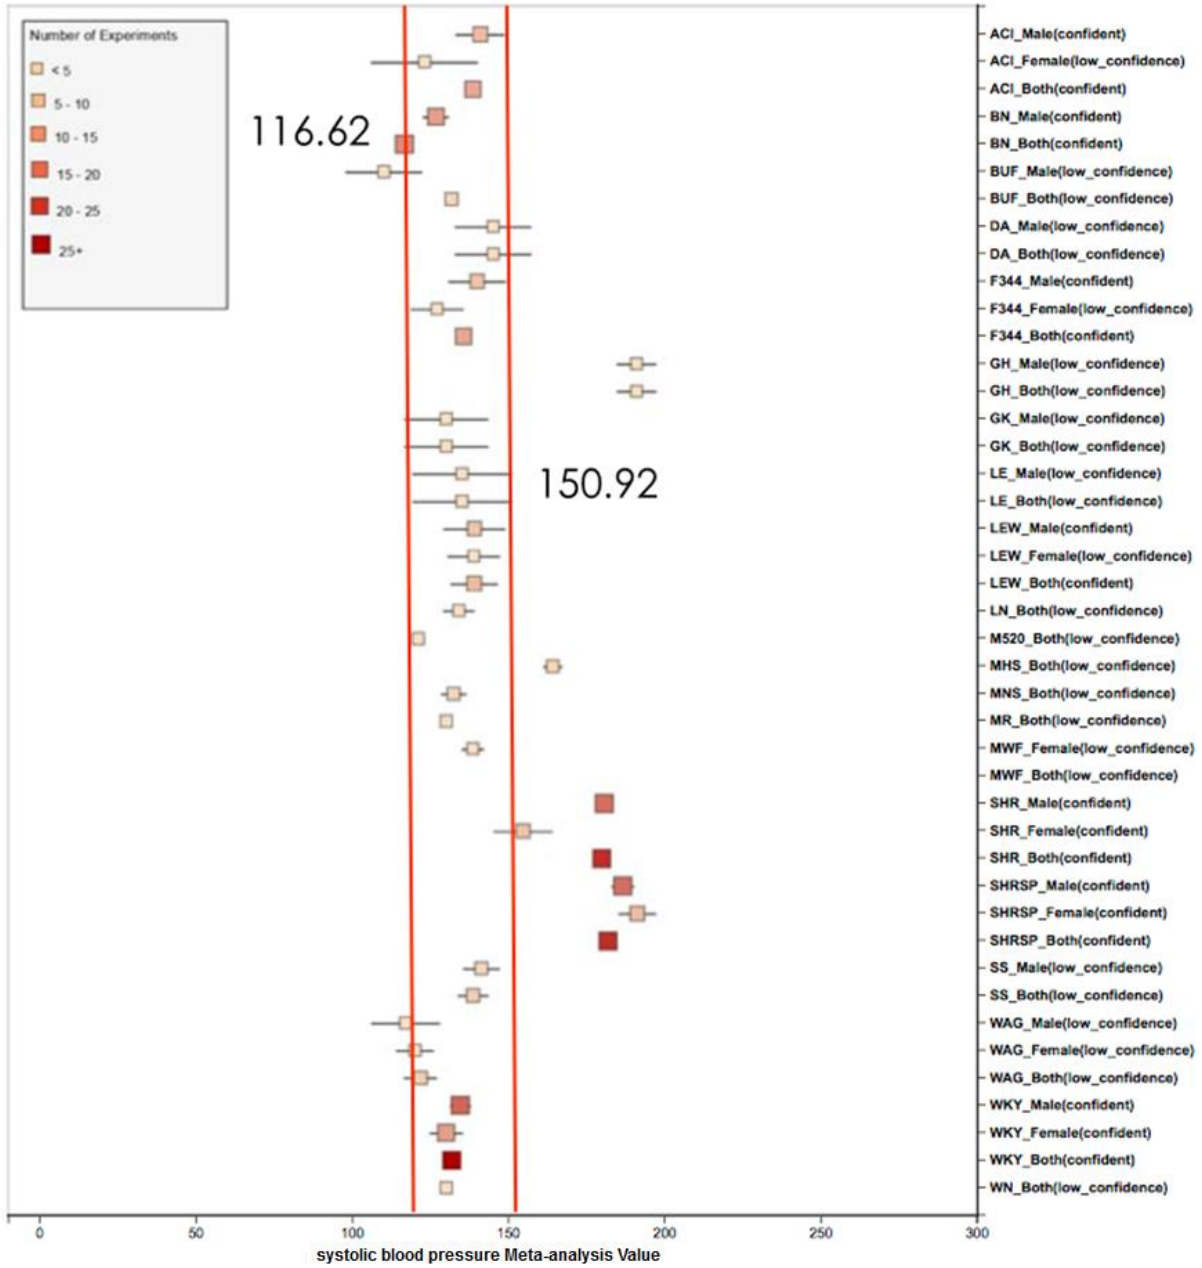



## SUPPLEMENTARY INFORMATION II: SUMMARY OF ABNORMAL AND NORMAL STRAINS FOR 24 CARDIOVASCULAR PHENOTYPES

| Phenotype                                                   | Abnormal           | Normal                                                           | Naïve Control |
|-------------------------------------------------------------|--------------------|------------------------------------------------------------------|---------------|
| blood hemoglobin level                                      |                    | all                                                              |               |
| diastolic blood pressure                                    | GH, LH, SHR, SHRSP | BN, HTG, LEW, MHS, WKY                                           | BN, WKY       |
| heart left ventricle weight to body weight ratio            | SHR                | COP, DA, DRY, F344, LEW, WKY                                     | WKY           |
| heart left ventricle wet weight                             | GH                 | BN, COP, DA, DRY, F344, LEW, SHR, WKY                            | BN, WKY       |
| heart rate                                                  | ACI, DA, GK        | BN, BUF, F344, FHH, GH, LE, LEW, SHR, SHRSP, SS, WAG, WKY        | BN, WKY       |
| heart right ventricle weight to left ventricle weight ratio | F344, FHH, GH      | LE, LEW, SHR, SS, WKY                                            | WKY           |
| heart right ventricle wet weight                            |                    | F344, WKY                                                        | WKY           |
| heart weight as percentage of body weight                   | FHH, SHR, SHRSP    | ACI, BN, BUF, COP, DA, F344, GK, LE, LEW, SS, WAG, WKY           | BN, WKY       |
| heart weight to body weight ratio                           | SHRSP              | ACI, BN, BUF, COP, DA, F344, ISIAH, M520, MWF, SHR, WAG, WKY, WN | BN, WKY       |
| heart wet weight                                            | BUF, FHH, GH, SS   | ACI, BN, COP, DA, F344, LE, LEW, MWK, WAG, WKY                   | BN, WKY       |
| hematocrit                                                  |                    | all                                                              |               |
| mean arterial blood pressure                                | GH, SHR, SHRSP     | BN, LE, LEW, SS, WKY                                             | BN, WKY       |
| mean corpuscular volume                                     |                    | all                                                              |               |
| plasma total cholesterol level                              |                    | HTG, LEW                                                         |               |
| plasma triglyceride level                                   |                    | COP, HTG, LEW                                                    |               |
| red blood cell count                                        |                    | all                                                              |               |
| serum aspartate aminotransferase activity level             | SHR                | BN, F344, FHH, GH, LE, LEW, SS, WKY                              | BN, WKY       |

|                               |                         |                                                                  |         |
|-------------------------------|-------------------------|------------------------------------------------------------------|---------|
| serum calcium level           | F344, GH, LE            | BN, FHH, LEW, SHR, SS, WKY                                       | BN, WKY |
| serum chloride level          |                         | all                                                              |         |
| serum free fatty acids level  |                         | F344                                                             |         |
| serum potassium level         |                         | all                                                              |         |
| serum total cholesterol level | GH, MWF, SHRSP          | BN, DA, EHC, F344, FHH, GH, LEW, SHR, SS, WKY, WOKW              | BN, WKY |
| serum triglyceride level      | DA, WOKW                | BN, EHC, F344, MWF, SHR                                          | BN      |
| systolic blood pressure       | GH, LH, MHS, SHR, SHRSP | ACI, BN, BUF, DA, F344, GK, LE, LEW, LN, M520, MNS, MR, MWF, WKY | BN, WKY |

\* ACI = August Copenhagen Irish, BN= Brown Norway, BUF= Buffalo, DA = Dark Agouti, F344 = Fischer 344, FHH = Fawn Hooded Hypertensive, GK = Goto Kakizaki, GH = Genetically Hypertensive, LH = Lyon Hypertensive, LEW = Lewis, SS = Dahl Salt-Sensitive, SHR = Spontaneously Hypertensive Rat, SHRSP = Spontaneously Hypertensive Rat, Stroke Prone, WKY = Wistar Kyoto

**SUPPLEMENTARY INFORMATION III: AGREEMENTS BETWEEN META-ANALYSIS RESULTS AND DOMAIN EXPERT EMPIRICAL KNOWLEDGE**

| Phenotype                                                   | Agreement | Disagreement |
|-------------------------------------------------------------|-----------|--------------|
| blood hemoglobin level                                      | 31        | 0            |
| diastolic blood pressure                                    | 23        | 0            |
| heart left ventricle weight to body weight ratio            | 13        | 0            |
| heart left ventricle wet weight                             | 15        | 2            |
| heart rate                                                  | 41        | 1            |
| heart right ventricle weight to left ventricle weight ratio | 24        | 3            |
| heart right ventricle wet weight                            | 2         | 0            |
| heart weight as percentage of body weight                   | 36        | 3            |
| heart weight to body weight ratio                           | 20        | 0            |
| heart wet weight                                            | 44        | 1            |
| hematocrit                                                  | 33        | 0            |
| mean arterial blood pressure                                | 30        | 0            |
| mean corpuscular volume                                     | 31        | 0            |
| plasma total cholesterol level                              | 5         | 0            |
| plasma triglyceride level                                   | 7         | 0            |
| red blood cell count                                        | 27        | 0            |
| serum aspartate aminotransferase activity level             | 27        | 0            |
| serum calcium level                                         | 27        | 0            |
| serum chloride level                                        | 27        | 0            |
| serum free fatty acids level                                | 2         | 0            |
| serum potassium level                                       | 27        | 0            |
| serum total cholesterol level                               | 35        | 0            |
| serum triglyceride level                                    | 12        | 0            |
| systolic blood pressure                                     | 27        | 1            |
